# Supplementary material for: Cross-Platform Comparison of Untargeted and Targeted Lipidomics Approaches on Aging Mouse Plasma
Source: PubMed Central journal article supplement (PMC6288111; doi:10.1038/s41598-018-35807-4), 2018-12-10

**Figure S1**

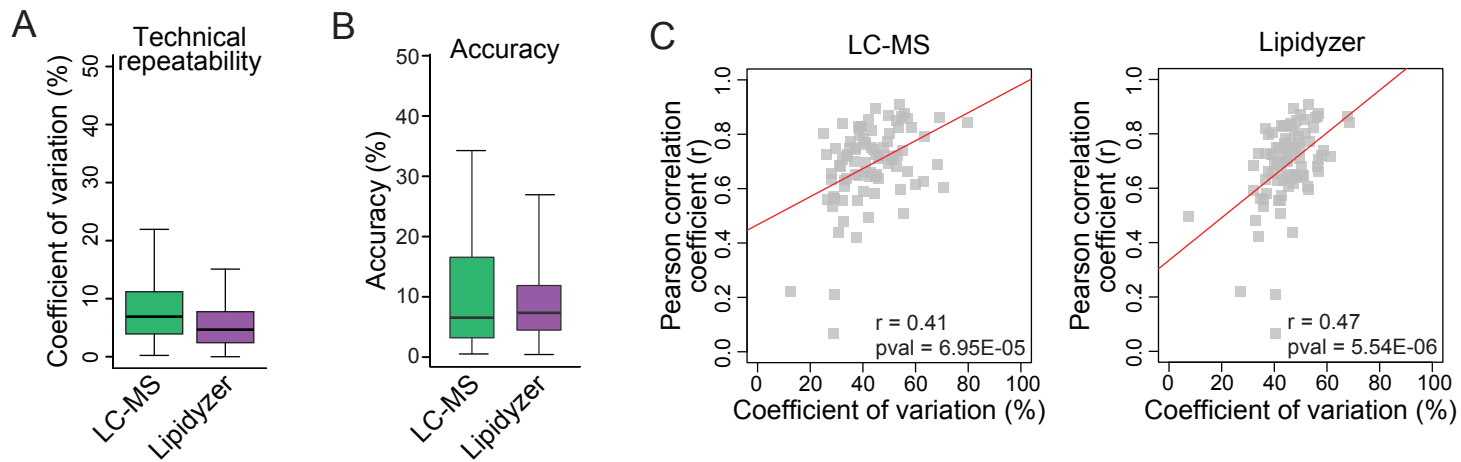

# Figure S2

# LC-MS platform

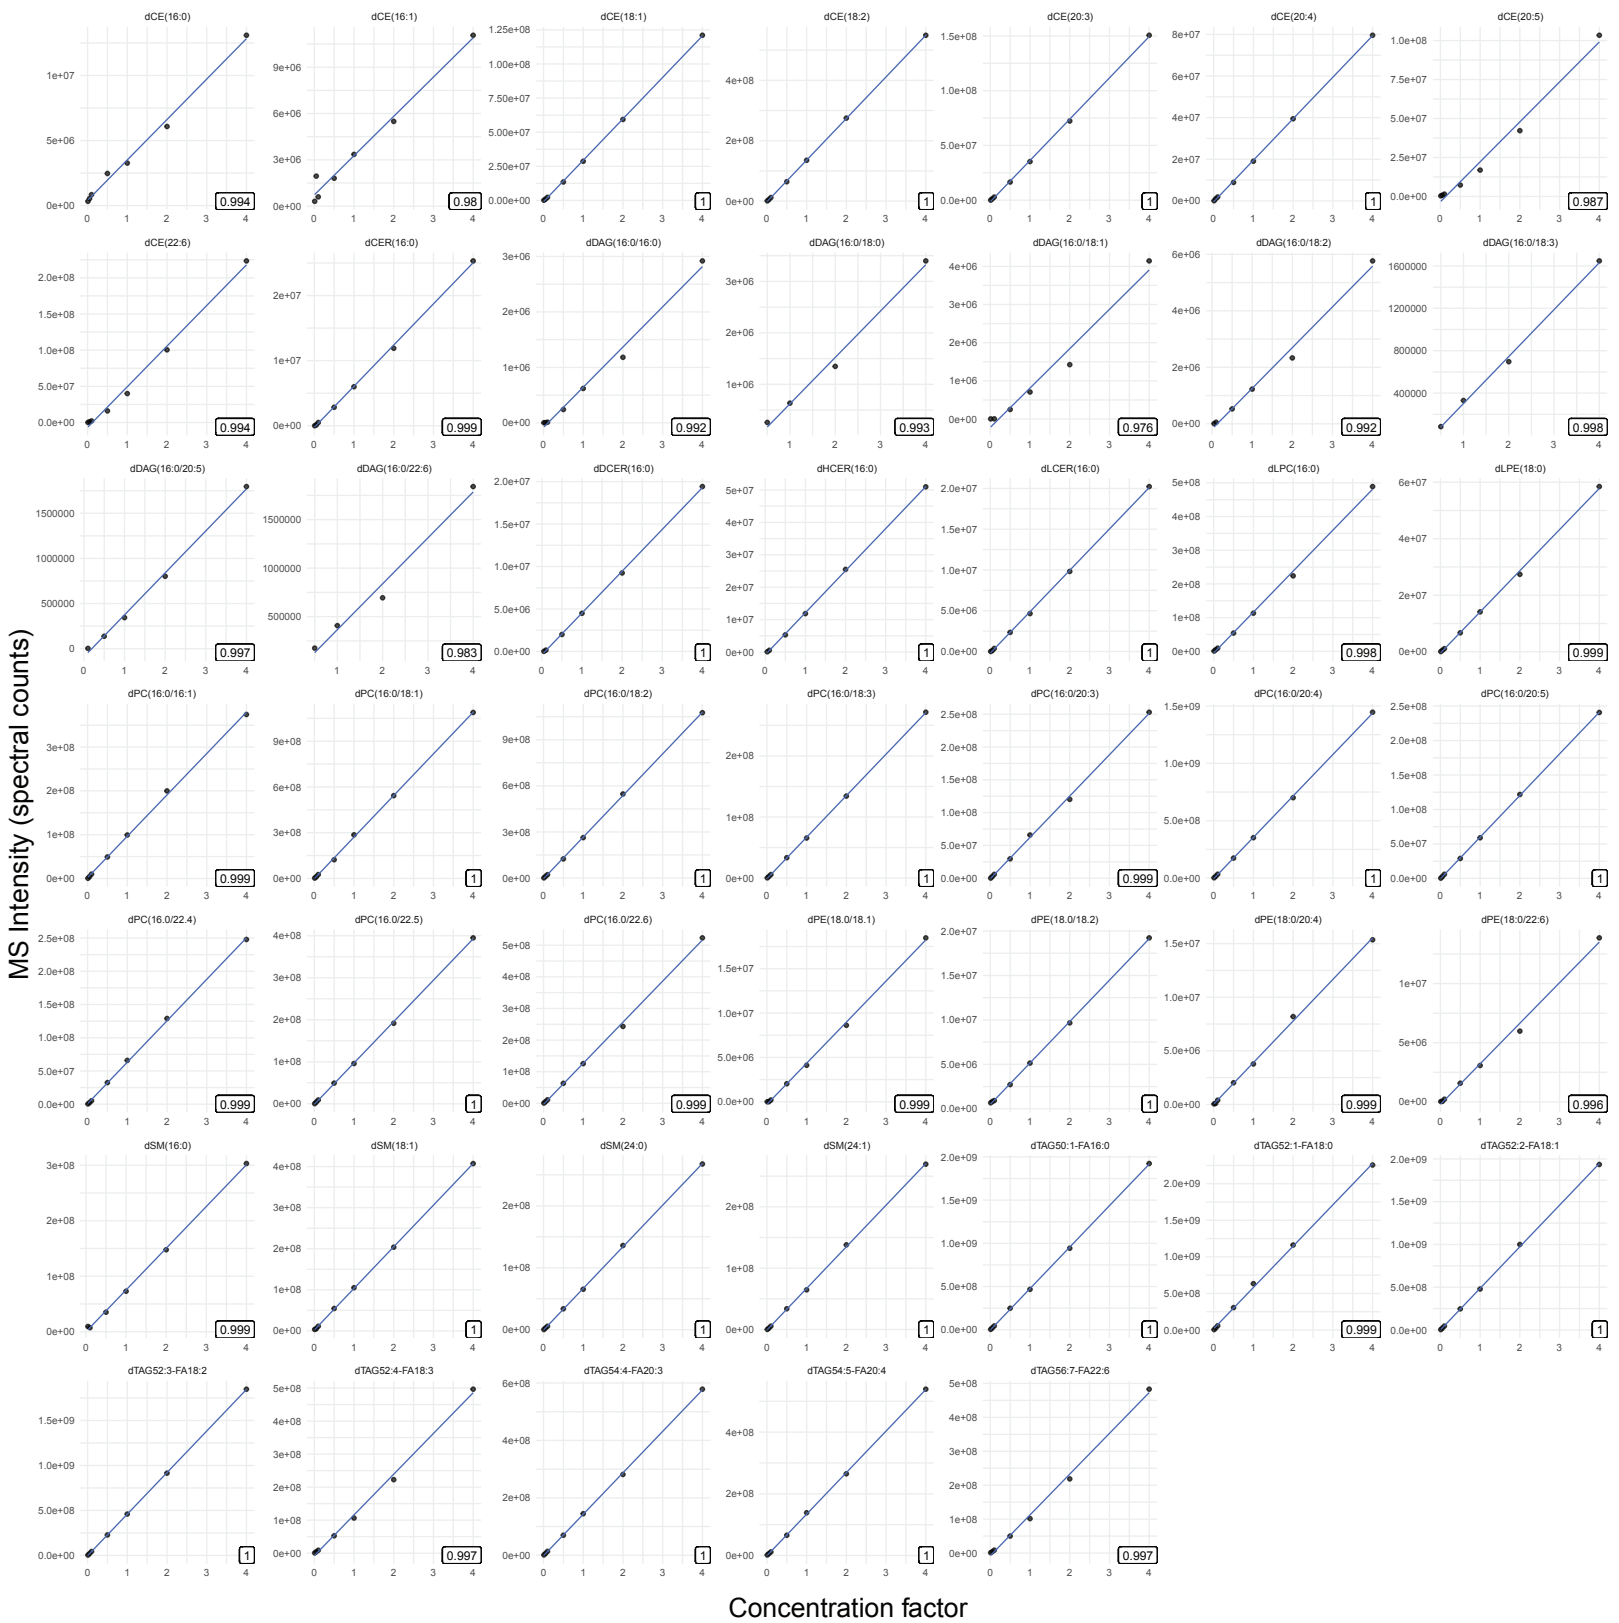

# Figure S3

# Lipidizer platform

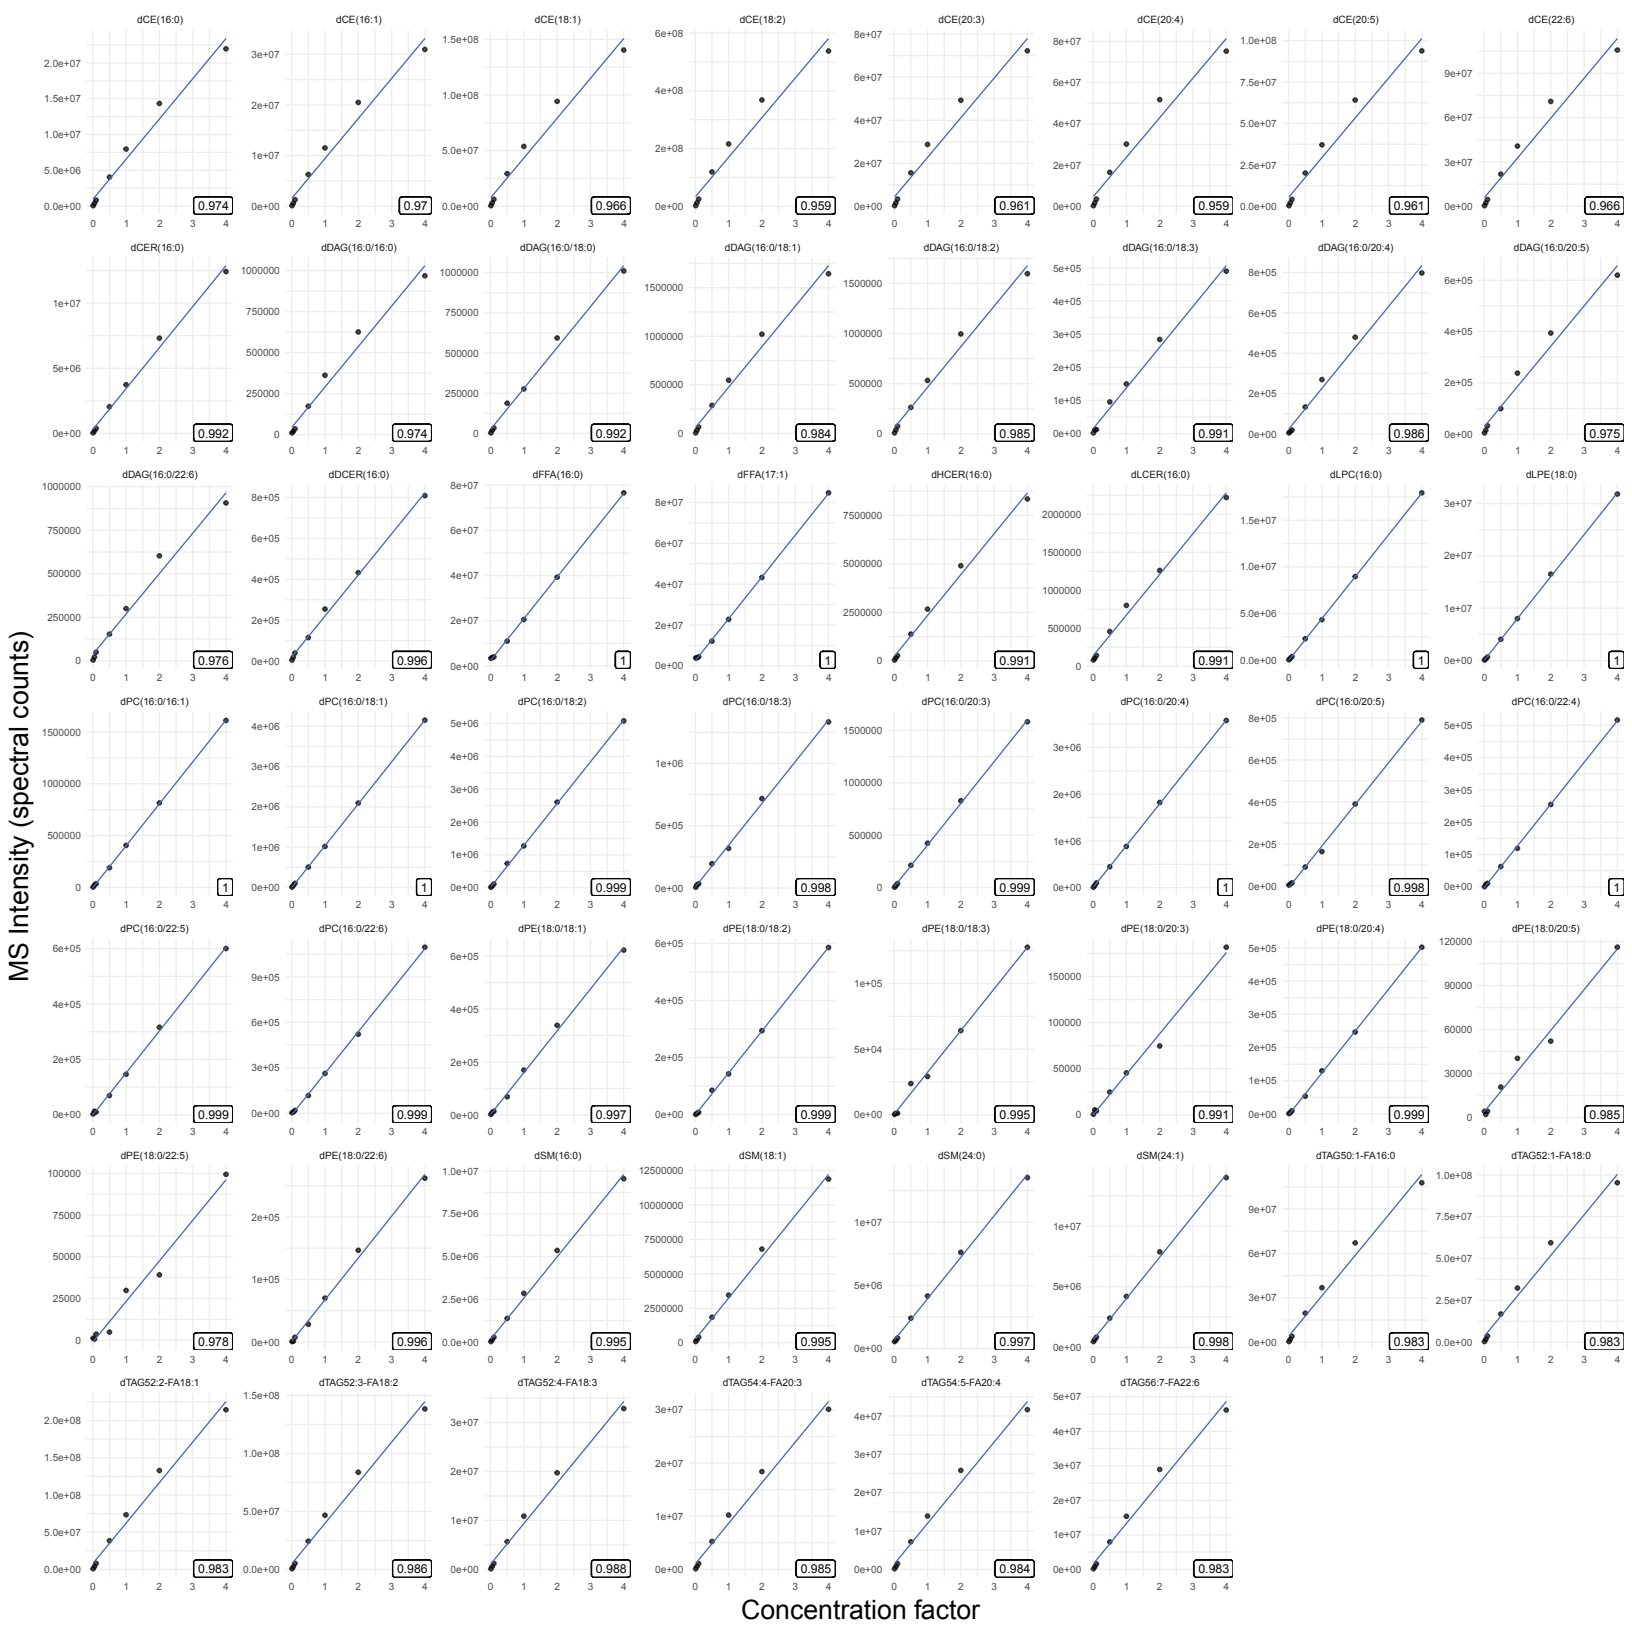

# Figure S4

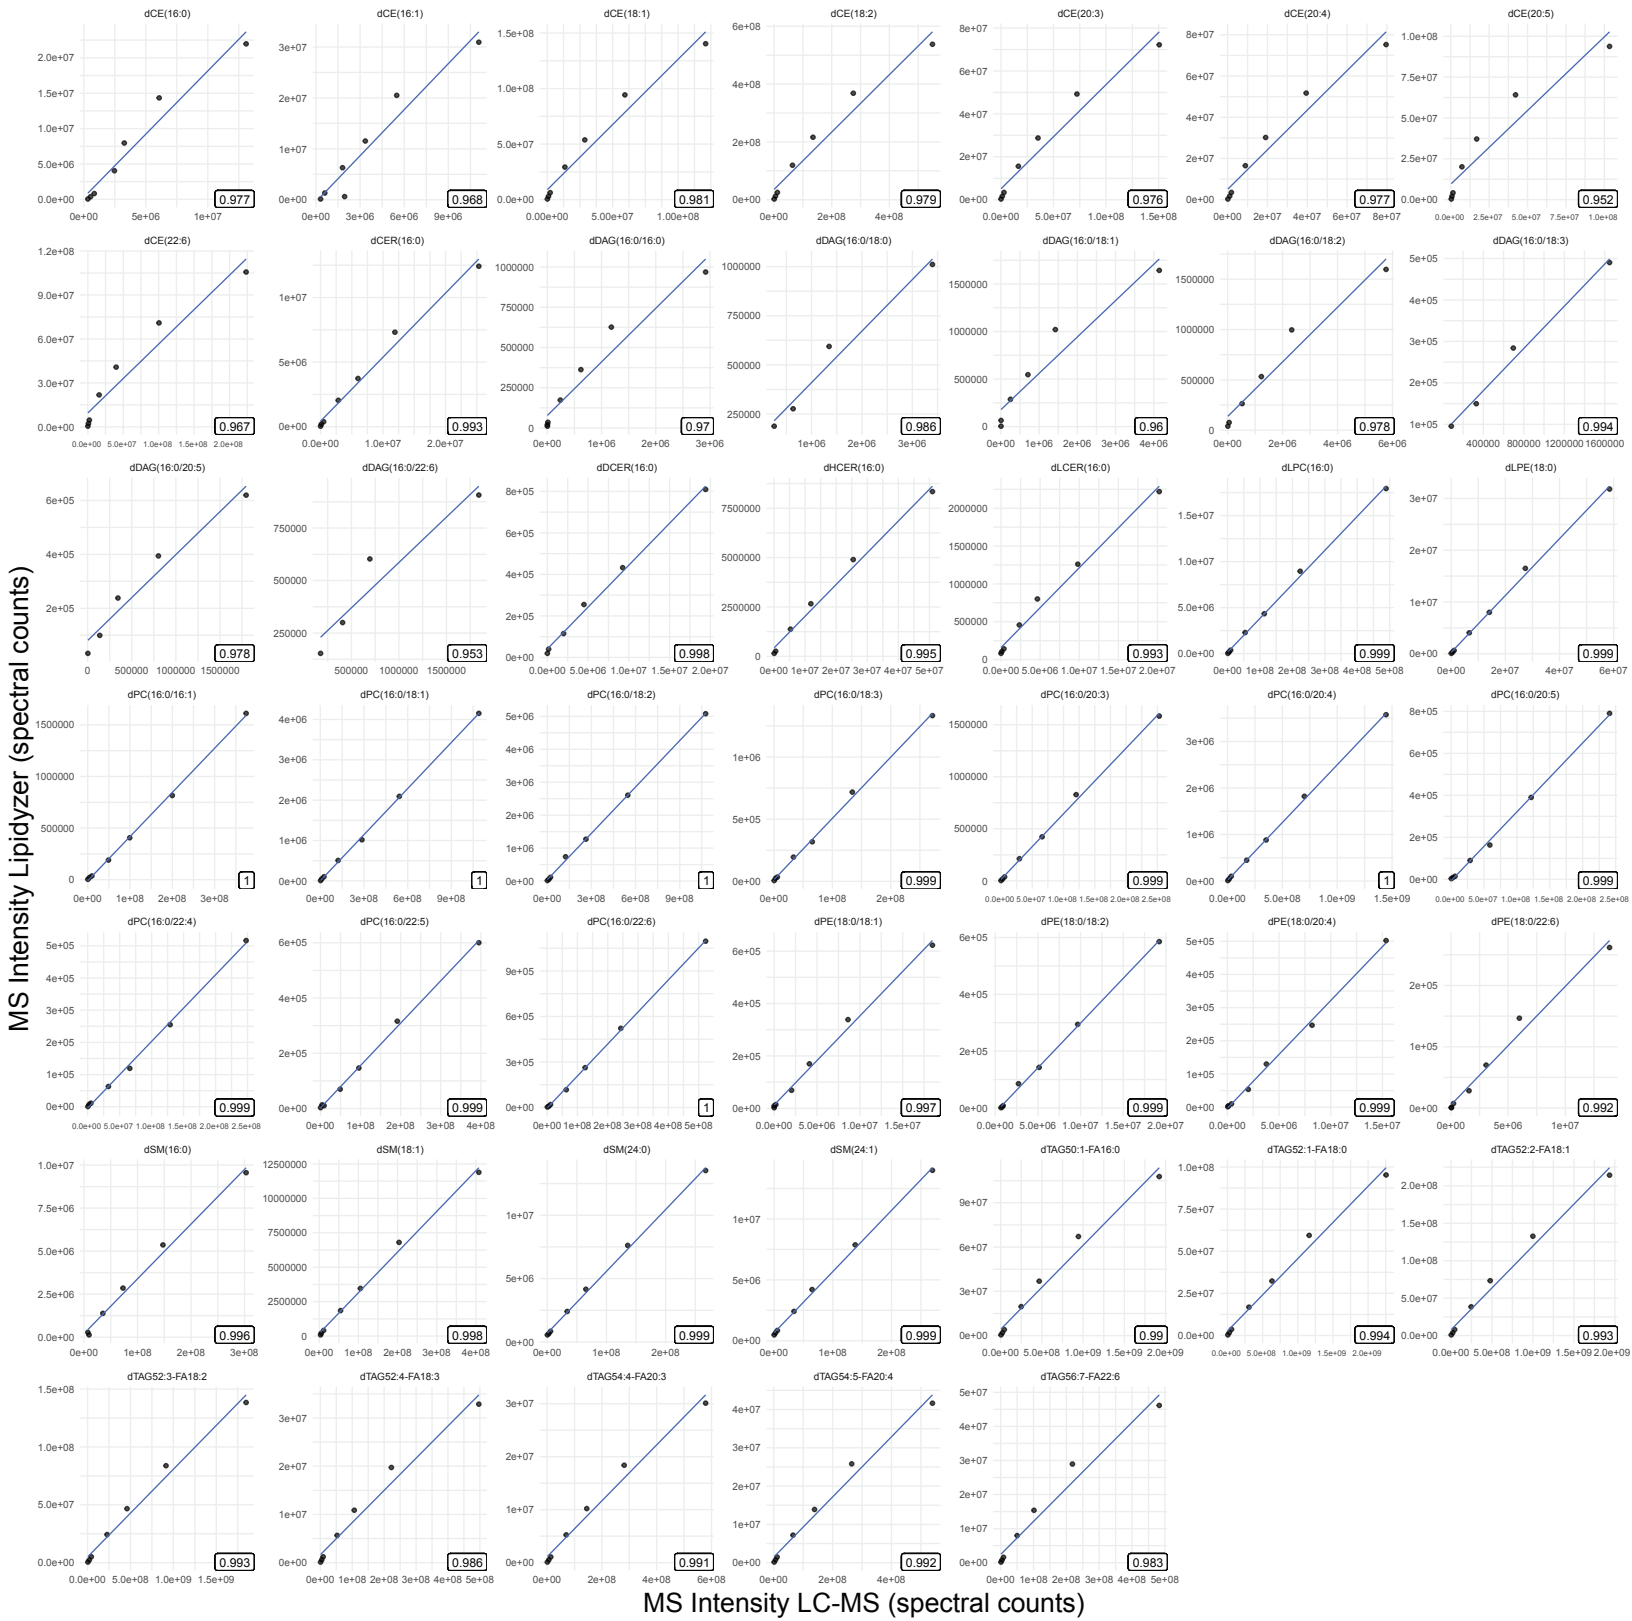

Supplement: 41598_2018_35807_MOESM2_ESM.pdf [file 41598_2018_35807_MOESM2_ESM.pdf]
